# Supplementary material for: Feasibility and Acceptability of a Mobile Technology Intervention to Support Postabortion Care After Surgical Abortion (the FACTS Study Phase 3): Mixed Methods Prospective Pilot Study
Source: PubMed Central journal article supplement (PMC10807380; doi:10.2196/46284), 2024-01-09
Supplement: formative_v8i1e46284_app1.pdf [file formative_v8i1e46284_app1.pdf]

|                                                                                                   |              | group                  |                              |         |
|---------------------------------------------------------------------------------------------------|--------------|------------------------|------------------------------|---------|
|                                                                                                   | Total        | responded to follow up | did not respond to follow up | P-value |
|                                                                                                   | No. 62       | No. 25                 | No. 37                       |         |
| <b>Age</b>                                                                                        |              |                        |                              |         |
| Median (IQR)                                                                                      | 30 (25 - 34) | 29 (25 - 33)           | 30 (24 - 34)                 | 0.99    |
| <b>Born in Canada</b>                                                                             |              |                        |                              |         |
| Yes                                                                                               | 37 (59.7%)   | 16 (64.0%)             | 21 (56.8%)                   | 1       |
| No                                                                                                | 19 (30.6%)   | 8 (32.0%)              | 11 (29.7%)                   |         |
| Missing                                                                                           | 6 (9.7%)     | 1 (4.0%)               | 5 (13.5%)                    |         |
| <b>How far travelled to the clinic</b>                                                            |              |                        |                              |         |
| 10 km or less                                                                                     | 22 (35.5%)   | 8 (32.0%)              | 14 (37.8%)                   | 0.78    |
| 10 to 50 km                                                                                       | 25 (40.3%)   | 12 (48.0%)             | 13 (35.1%)                   |         |
| 50 to 100 km                                                                                      | 4 (6.5%)     | 1 (4.0%)               | 3 (8.1%)                     |         |
| >100 km                                                                                           | 9 (14.5%)    | 3 (12.0%)              | 6 (16.2%)                    |         |
| Missing                                                                                           | 2 (3.2%)     | 1 (4.0%)               | 1 (2.7%)                     |         |
| <b>Highest level of Education</b>                                                                 |              |                        |                              |         |
| Elementary school, middle school, some high school                                                | 4 (6.5%)     | 2 (8.0%)               | 2 (5.4%)                     | 0.65    |
| High school graduation                                                                            | 20 (32.3%)   | 7 (28.0%)              | 13 (35.1%)                   |         |
| Trades certificate or Non-university certificate or University certificate below bachelor's level | 17 (27.4%)   | 6 (24.0%)              | 11 (29.7%)                   |         |
| Bachelor's degree                                                                                 | 13 (21.0%)   | 6 (24.0%)              | 7 (18.9%)                    |         |

|                                                                    |                |                |                |       |
|--------------------------------------------------------------------|----------------|----------------|----------------|-------|
| Post graduate degree or professional qualification (e.g. MSc, PhD) | 6 (9.7%)       | 4 (16.0%)      | 2 (5.4%)       |       |
| Prefer not to answer                                               | 2 (3.2%)       | 0 (0.0%)       | 2 (5.4%)       |       |
| <b>Income</b>                                                      |                |                |                |       |
| \$0 - \$14,999                                                     | 12 (19.4%)     | 6 (24.0%)      | 6 (16.2%)      | 0.82  |
| \$15,000 - \$24,999                                                | 8 (12.9%)      | 5 (20.0%)      | 3 (8.1%)       |       |
| \$25,000 - \$34,999                                                | 7 (11.3%)      | 2 (8.0%)       | 5 (13.5%)      |       |
| \$35,000 - \$44,999                                                | 8 (12.9%)      | 3 (12.0%)      | 5 (13.5%)      |       |
| \$45,000 - \$54,999                                                | 7 (11.3%)      | 2 (8.0%)       | 5 (13.5%)      |       |
| Above \$55,000                                                     | 11 (17.7%)     | 4 (16.0%)      | 7 (18.9%)      |       |
| Prefer not to answer                                               | 9 (14.5%)      | 3 (12.0%)      | 6 (16.2%)      |       |
| <b>Arizona Integrative Outcome scale</b>                           |                |                |                |       |
| Mean (SD)                                                          | 51.50 (±21.85) | 45.14 (±17.79) | 55.88 (±23.52) | 0.068 |
| Missing                                                            | 8 (12.90%)     | 3 (12.00%)     | 5 (13.51%)     |       |
| <b>WHO-5 wellbeing index</b>                                       |                |                |                |       |
| Mean (SD)                                                          | 44.6 (±25.1)   | 43.2 (±20.5)   | 45.6 (±27.9)   | 0.64  |
| Missing                                                            | 2 (3.2%)       | 1 (4.0%)       | 1 (2.7%)       |       |

**Table 1.** Demographic Data
